# Supplementary material for: Microarray analysis shows that some microRNAs downregulate large numbers of target mRNAs
Source: Springer Nature journal article supplement (doi:10.1038/nature03315), 2005-01-30
Supplement: 41586_2005_BFnature03315_MOESM3_ESM.pdf [file 41586_2005_BFnature03315_MOESM3_ESM.pdf]

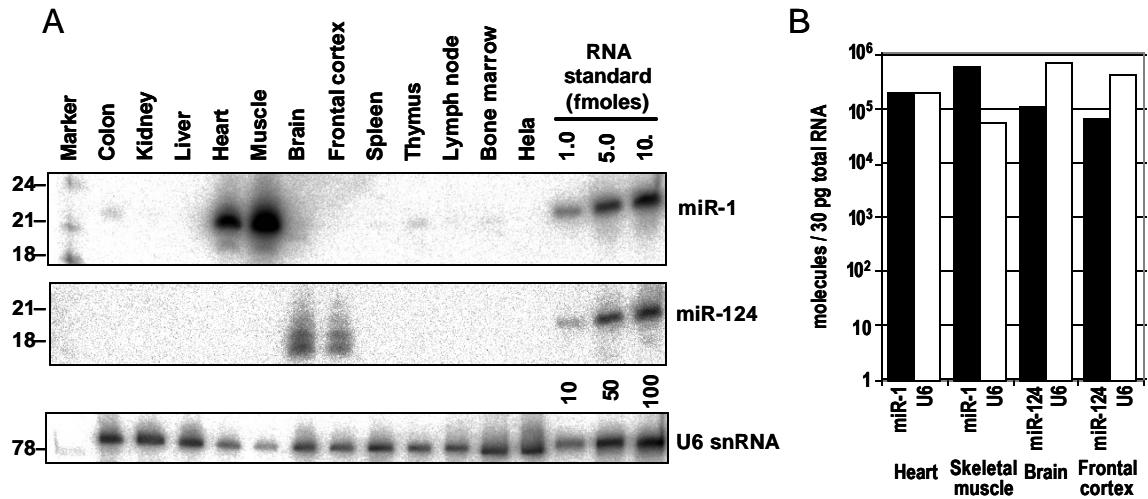

**Supplementary Figure 1.** Tissue-specific expression of miR-1 and miR-124 in human tissues. A) Northern blot of a human total RNA tissue panel. B) Molecular abundance of upregulated miRNAs and corresponding U6 snRNA in tissue types, based on quantitation of signals from the Northern blot in A). Standard curves were linear; microRNA and U6 snRNA abundance is reported per 30 pg of total RNA because this amount was calculated to be the average yield per cell when extracting total RNA from HeLa cells.
