# Supplementary material for: Microarray analysis shows that some microRNAs downregulate large numbers of target mRNAs
Source: Springer Nature journal article supplement (doi:10.1038/nature03315), 2005-01-30

**Supplementary Figure 3.** Expected and observed CAUUC and UGCCUU word counts in different regions of miR-1 or miR-124 downregulated transcripts. Expected frequencies were calculated using the sequences of all LocusLink genes represented on the microarray.

### CAUUC counts in miR-1 downregulated transcripts

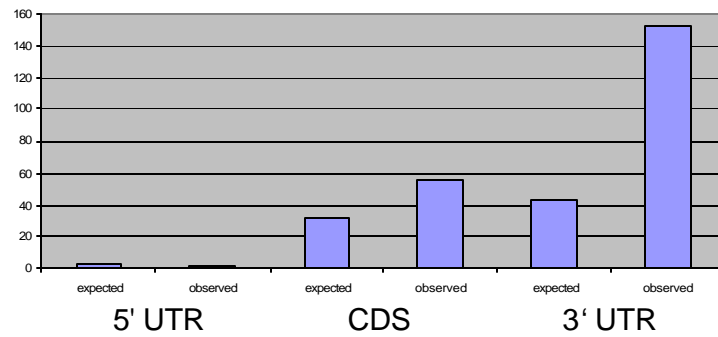

### UGCCUU counts in miR-124 downregulated transcripts

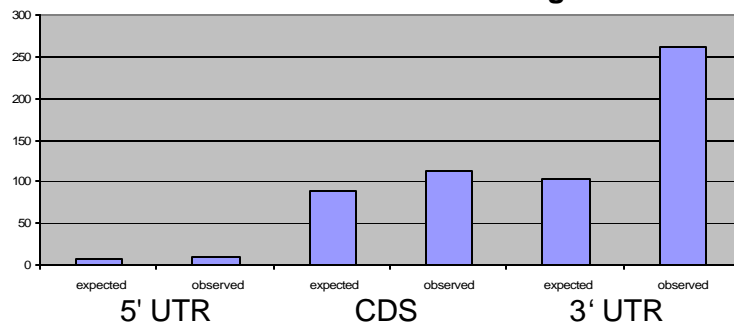

Supplement: 41586_2005_BFnature03315_MOESM5_ESM.pdf [file 41586_2005_BFnature03315_MOESM5_ESM.pdf]
