# Supplementary material for: Microarray analysis shows that some microRNAs downregulate large numbers of target mRNAs
Source: Springer Nature journal article supplement (doi:10.1038/nature03315), 2005-01-30

**Supplementary Figure 4.** p-values of enrichment for hexamers complementary to miR-124 in the UTRs of the miR-124 downregulated genes. All perfectly complementary hexamers are shown, as well as complementary hexamers (marked by an asterisk) that would form a G:U basepair and have a p-value < 0.05. Position of the hexamer with respect to the 5' end of the miRNA is given. p-values were calculated as in Supplementary Table 3, but no Bonferroni correction has been made.

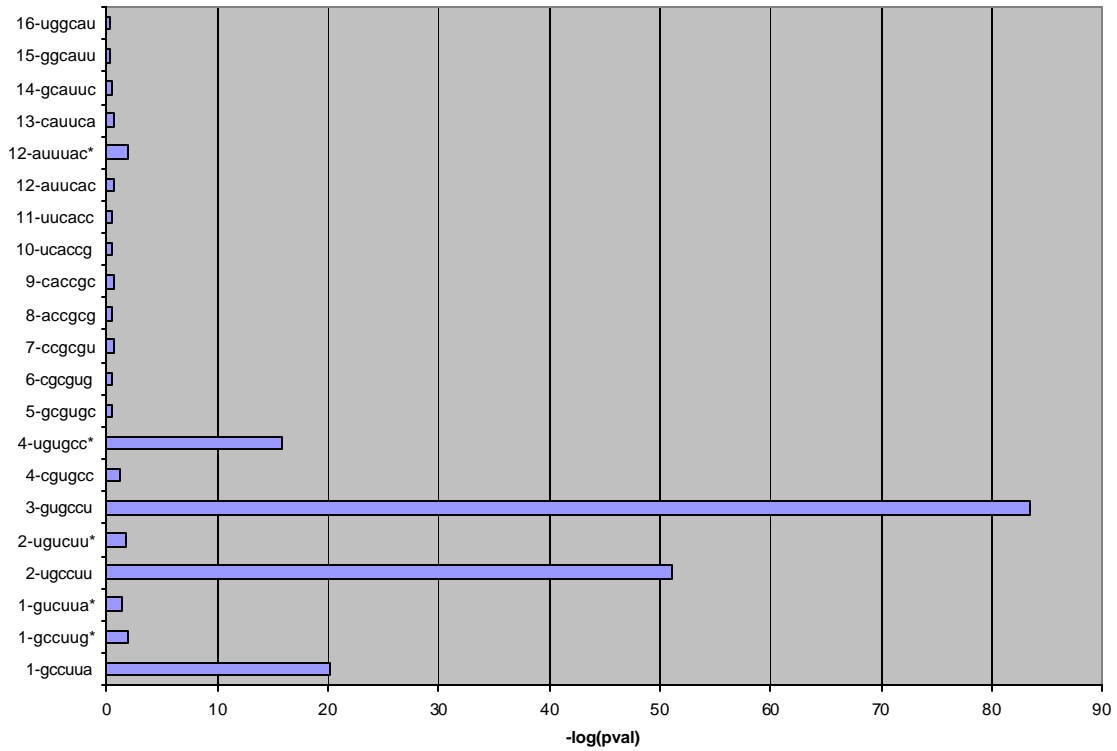

Supplement: 41586_2005_BFnature03315_MOESM6_ESM.pdf [file 41586_2005_BFnature03315_MOESM6_ESM.pdf]
